# Supplementary material for: Soluble factors from stellate cells induce pancreatic cancer cell proliferation via Nrf2-activated metabolic reprogramming and ROS detoxification
Source: PubMed Central journal article supplement (PMC5095034; doi:10.18632/oncotarget.9165), 2016-05-04
Supplement: oncotarget-07-36719-s001.pdf [file oncotarget-07-36719-s001.pdf]

## SUPPLEMENTARY FIGURES AND TABLE

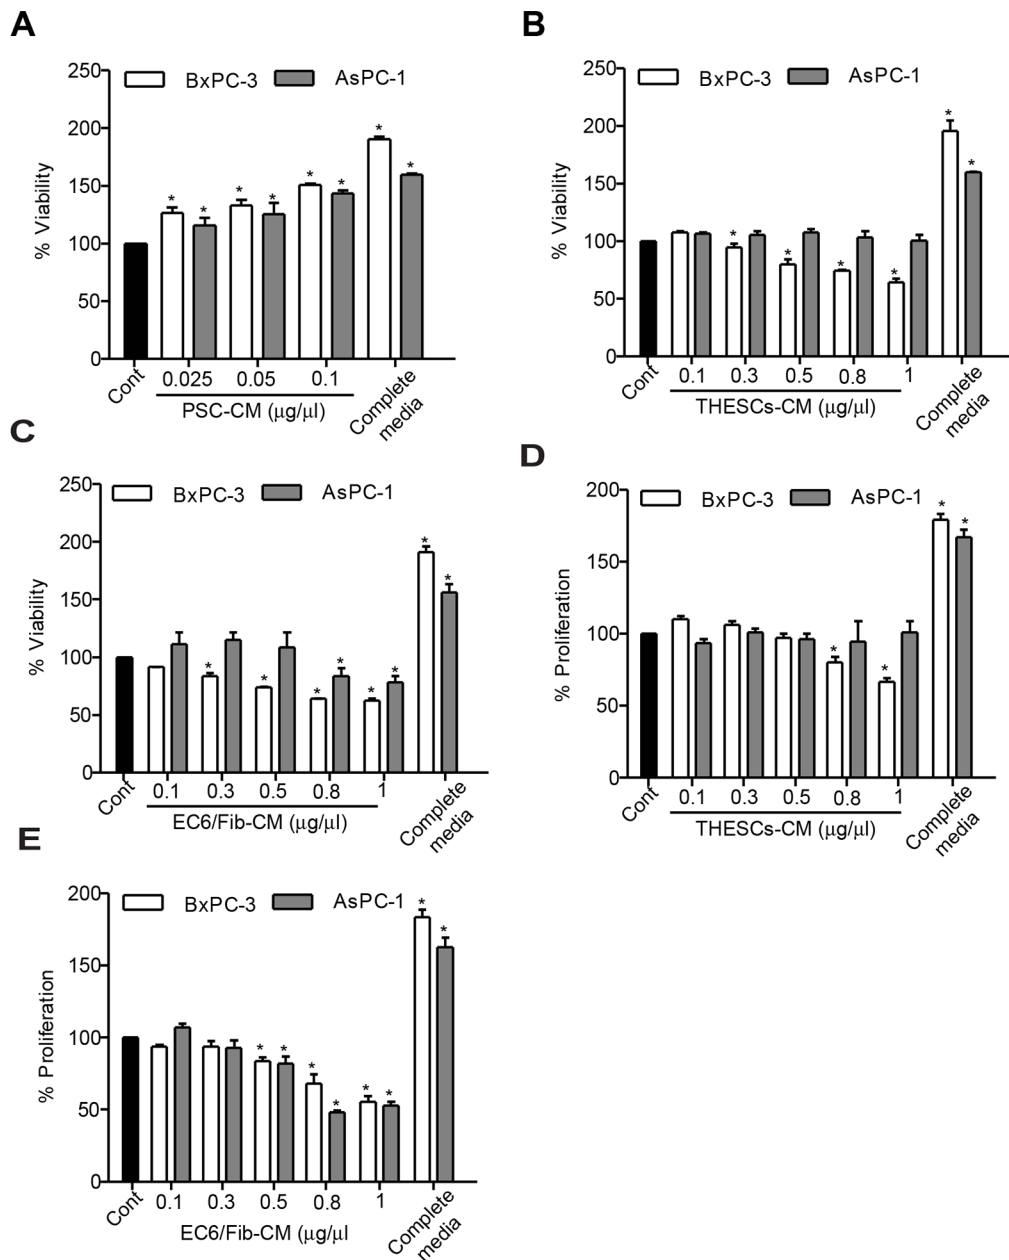

**Supplementary Figure S1: The effect of various fibroblasts-derived conditioned media on PDAC cell proliferation.** PSC were culture in media devoid of FBS (0% FBS) for 72 hours, while normal endometrial fibroblasts (THESC) and cancer-associated fibroblasts from endometrial cancer (EC6/Fib) were cultured in media containing 1% FBS for 72 hours, before collection of conditioned media. PDAC cells were treated with these different conditioned media for 72 hours before analysis of cell viability using MTT assay **A–C**, cell counting **D–E**. All experiments were performed in triplicates, and data are expressed as mean  $\pm$  SD. All data are statistically significant ( $P < 0.05$  versus cells treated with blank media).

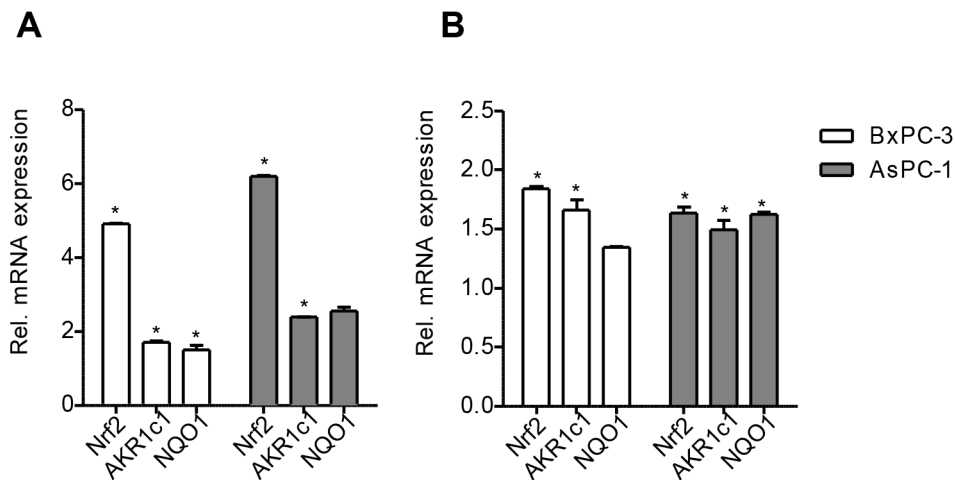

**Supplementary Figure S2: Expression of Nrf2 and its target genes in cells overexpressed with Nrf2 cDNA vector.** **A.** Cells were transfected with control or Nrf2 cDNA vectors for 5 h, before subjected to qPCR analysis. **B.** Cells were transfected with Nrf2 cDNA vectors for 5 h, followed by treatment with PSC-CM (1.0  $\mu\text{g}/\mu\text{l}$ , 72 h). The mRNA levels of genes were measured with qPCR. Data are expressed as mean  $\pm$  SD. \*,  $P < 0.05$ .

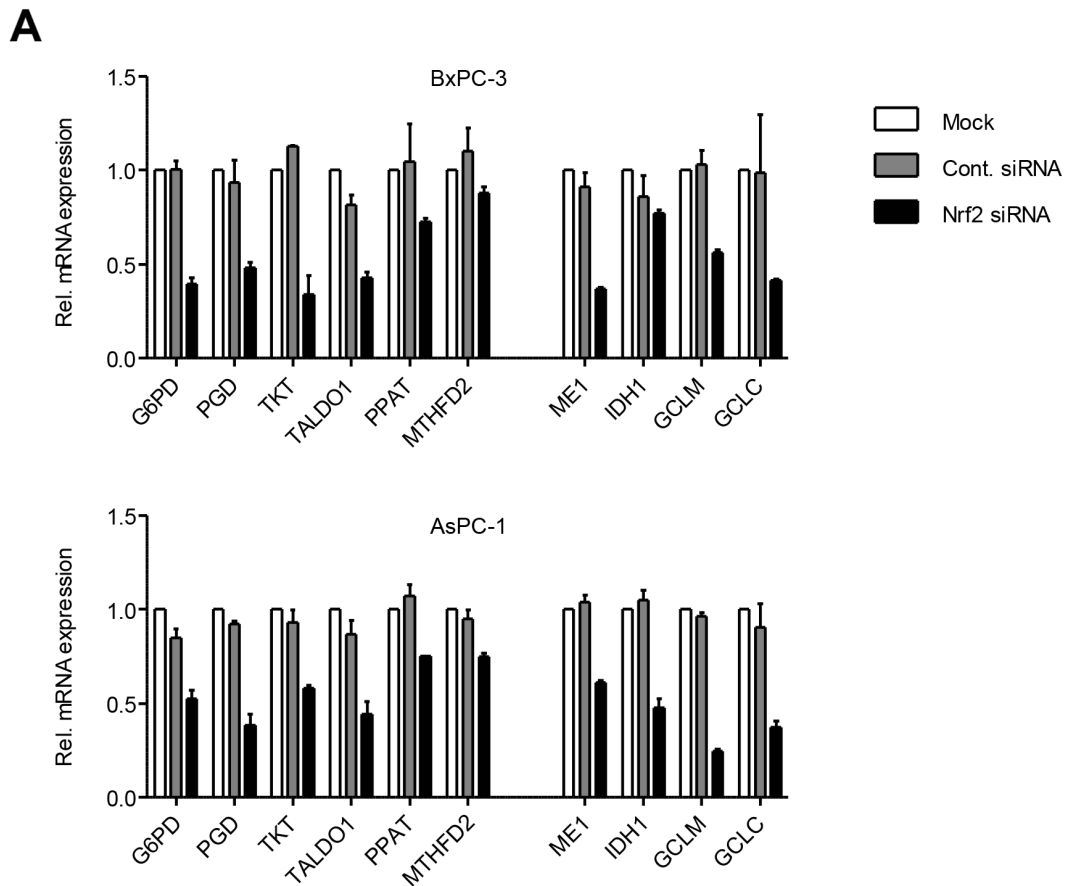

**Supplementary Figure S3: Nrf2 induces metabolic genes expression.** **A.** After Nrf2 gene was silenced, the mRNA level of Nrf2-mediated metabolic genes was quantified using qRT-PCR. All experiments were performed in triplicates, and representative data are shown. Data are expressed as mean  $\pm$  SD. \*,  $P < 0.05$  versus control siRNA transfected cells.

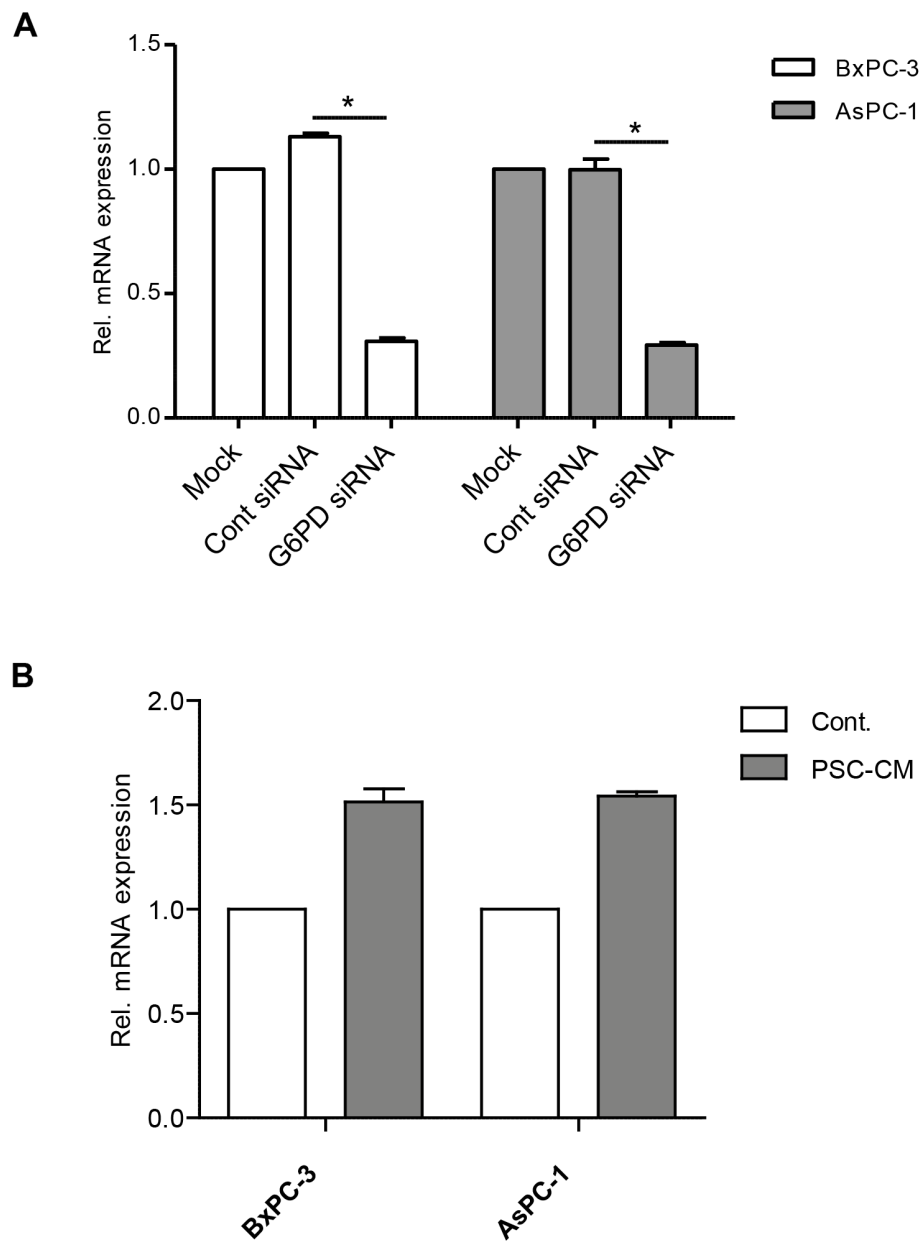

**Supplementary Figure S4: G6PD gene expression after RNAi-mediated gene silencing.** Upon transfection of PDAC cells with G6PD siRNA, control siRNA or transfection reagent alone for 48 h, the mRNA levels of G6PD was measured with qPCR **A**. Some cells were further treated with PSC-CM (1.0  $\mu\text{g}/\mu\text{l}$ ) for another 72 h, before analysis of G6PD expression **B**. Data are expressed as mean  $\pm$  SD. \*,  $P < 0.05$  G6PD siRNA versus control siRNA.

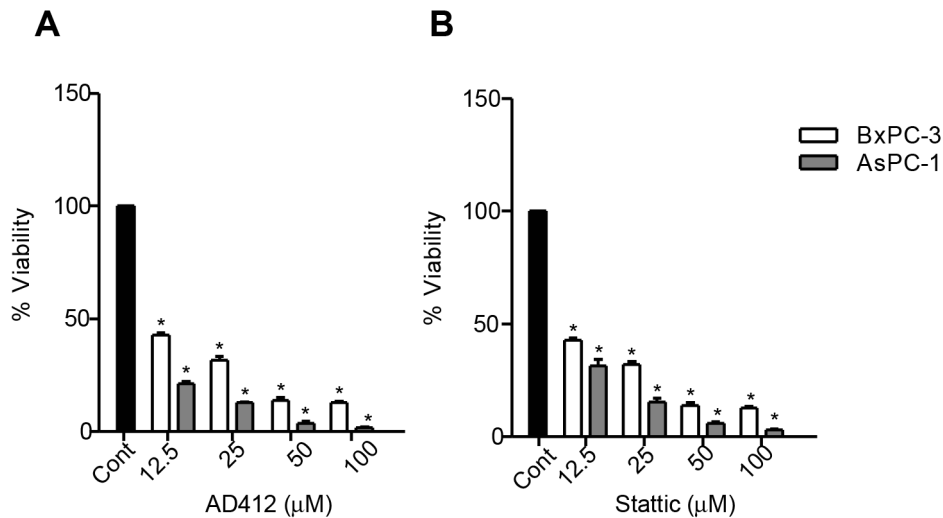

**Supplementary Figure S5: Inhibition of JAK3 and Stat3 signaling abrogated PSC-CM-mediated PDAC cell proliferation.** A, B. Cells were treated with AD412 and Stattic in the presence of PSC-CM (1.0 μg/μl) for 72 h. MTT assay was used to determine the cell viability. All experiments were performed in triplicates, and data are expressed as mean ± SD. \*, P<0.05 versus cells treated with PSC-CM.

**Supplementary Table S1: List of primer pairs used for qRT-PCR**

| Gene   | Forward primer (5'-3') | Reverse primer (5'-3') |
|--------|------------------------|------------------------|
| GAPDH  | CCCATCACCATCTTCCAGGA   | GTTGTCATGGATGACCTTGGC  |
| Keap1  | CAGATTGGCTGTGTGGAGTT   | GCTGTTTCGACGTCGTACTION |
| Nrf2   | GAGAGCCCAGTCTTCATTGC   | TTGGCTTCTGGACTTGGAAAC  |
| HMOX1  | GGTAAGAACCAGGTCCGTC    | GGGCACTAACTCCCGTTACA   |
| CAT    | CATGCTGAATGAGGAACAGA   | TTGTCCAGAAGAGCCTGGAT   |
| AKR1c1 | ATCCCATCGACCAGAGTTG    | TTTGGGATCACTTCTCACC    |
| NQO1   | GAAGAGCACTGATCGTACTGGC | GGATACTGAAAGTTCGCAGGG  |
| SOD1   | GGTGGGCCAAAGGATGAAGAG  | CCACAAGCCAAACGACTTCC   |
| SOD2   | GACAAACCTCAGCCCTAACG   | CTGATTTGGACAAGCAGCAA   |
| SOD3   | ATGCTGGCGCTACTGTGTTC   | CTCCGCCGAGTCAGAGTTG    |
| G6PD   | ACCGCATCGACCACTACCT    | TGGGGCCGAAGATCCTGTT    |
| PGD    | ATGGCCCAAGCTGACATCG    | AAAGCCGTGGTCATTCATGTT  |
| TKT    | CCTACACCGGCAAATACTTCG  | GCCTCCATACAGAGCCCT     |
| TALDO1 | CTCACCCGTGAAGCGTCAG    | GTTGGTGGTAGCATCCTGGG   |
| PPAT   | AATTGTCAGCCCTTCGTTGTT  | CCTTAATCGAGCAGCATTACCA |
| MTHFD2 | AGGACGAATGTGTTTGGATCAG | GGAATGCCAGTTCGCTTGATTA |
| ME1    | GAGTGCTGACATCTGACATTGA | TTGGCTCCGAAACACCAAAC   |
| IDH1   | AGAAGCATAATGTTGGCGTCA  | CGTATGGTGCCATTTGGTGATT |
| GCLC   | GGCGATGAGGTGGAATACAT   | GGGTAGGATGGTTTGGGTTT   |
| GCLM   | CATTACAGCCTTACTGGGAGG  | ATGCAGTCAAATCTGGTGGCA  |
